# Supplementary material
Source: publisher figshare collection journal article supplement (https://gsapubs.figshare.com/ndownloader/files/22409046)
Supplement: Supplementary file 1 [file 22409046]

## Sheet: Sheet1
Sample ID - Formation or River	Latitude	Longitude	Location Description
1 - Susitna River	61.359	-150.579	Mouth of river at Cook Inlet
1 - Susitna River	62.1758	-150.178	Parks Highway
1 - Susitna River	63.105	-147.517	Denali Highway
2 - Beluga Formation	61.2191	-151.178	Beluga River, Capps Glacier area
3 - Tyonek Formation	61.2632	-151.246	Beluga River, Capps Glacier area
4 - Tyonek Formation	61.8719	-151.712	Contact Creek, Susitna basin
5 - West Foreland Formation	61.3869	-151.046	Theodore River, Capps Glacier area
6 - West Foreland Formation	61.2912	-151.937	South side of Capps Glacier
7 - Matanuska River	61.7492	-148.637	Matanuska Valley
8 - Sterling Formation	60.2406	-151.398	Clam Gulch area, Kenai Peninsula
9 - Beluga Formation	59.7682	-151.135	Kachemak Bay, Kenai Peninsula
10 - Tyonek Formation	59.4812	-151.655	Barabara Point, Kenai Peninsula
11 - Tyonek Formation	61.7125	-149.231	Hatcher Pass Road, Matanuska Valley
12 - Tazlina River	62.0559	-145.428	Richardson Highway
12 - Tonsina River	61.6499	-145.188	Richardson Highway
